# Supplementary material for: Infants Hospitalized for Acute COVID-19: Disease Severity in a Multicenter Cohort Study
Source: Research Square preprint supplement (doi:10.21203/rs.3.rs-1109292/v1), 2021-12-21
Supplement: Supplementary file 1 [file ef73b18cb0930ffe9bd6fd5c.docx]

**Supplement**

Supplement Figure 1 : Level of care required for 324 children hospitalized with acute COVID-19 in Canada, Costa Rica and Iran Feb 1, 2020- May 31, 2021

834 admissions with a positive test for SARS-CoV-2

690 admissions

Severity of illness score based on highest level of care required during the admission:

Level 1 – ward with no supplemental oxygen = mild

Level 2 – ward with supplemental low flow oxygen = severe

Level 3 – ward with high flow oxygen = severe

Level 4 – ICU for reasons unrelated to COVID-19 = severe

Level 4 – ICU for telemetry/ observation = critical

Level 5 – ICU for supplemental oxygen including high flow = critical

Level 6 – Vasopressors = critical

Level 7 – Non-invasive ventilation= critical

Level 8 – Mechanical ventilation= critical

Level 9 – Died = critical

144 admissions excluded as they met WHO criteria for MIS-C

346 admissions excluded as COVID-19 was not the primary diagnosis

324 admissions where acute COVID-19 was the primary diagnosis (209 in Canada, 89 in Costa Rica and 26 in Iran)

Supplement Table 1: Crude ORs from ordinal logistic regression with their 95%CI for increased severe disease (mild disease versus severe or critical disease) by age groups: sensitivity analyses.

|  | **OR* (95%CI)** |
| --- | --- |
| **0-29 days** | 0.56 (0.28-1.11) |
| **30d-11mo** | 0.48 (0.29-0.79) |
| **1-17 yo** | ref |
|  |  |
| **0-5 mo** | 0.67 ( 0.26- 1.72) |
| **6-11 mo** | ref |

*ORs cannot be interpreted as risks because of non-collapsibility of the OR and a non-rare outcome.

Legend: OR- odds ratio
